# Supplementary material
Source: publisher figshare collection journal article supplement (https://gsajournals.figshare.com/ndownloader/files/25732718)
Supplement: Supplementary file 1 [file 25732718]

## Sheet: Sheet1
Table S2
Label No.	EcoCyc protein complex ID	Name of complex
1	3-ISOPROPYLMALISOM-CPLX	3-isopropylmalate dehydratase
2	CPLX0-8178	peptidoglycan glycosyltransferase / peptidoglycan DD-transpeptidase - MrcB-LpoB complex
3	SULFITE-REDUCT-CPLX	assimilatory sulfite reductase (NADPH)
4	TRYPSYN	tryptophan synthase
5	PC00027	DNA-binding transcriptional dual regulator IHF
6	GLUTAMIDOTRANS-CPLX	imidazole glycerol phosphate synthase
7	SULFATE-ADENYLYLTRANS-CPLX	sulfate adenylyltransferase
8	CPLX0-7609	5-carboxymethylaminomethyluridine-tRNA synthase [multifunctional]
9	CPLX0-3107	ClpXP
10	CARBPSYN-CPLX	carbamoyl phosphate synthetase
11	SUCCCOASYN	succinyl-CoA synthetase
12	PYRUVATEDEH-CPLX	pyruvate dehydrogenase
13	ABC-63-CPLX	Zn2+ ABC transporter
14	CYSSYNMULTI-CPLX	cysteine synthase complex
15	RNAP70-CPLX	RNA polymerase sigma 70
16	CPLX0-2021	DNA-binding transcriptional dual regulator HU
17	CPLX-3946	exodeoxyribonuclease VII
18	CPLX0-7910	DNA polymerase III, Psi-Chi subunit
19	CPLX0-3949	thiazole synthase
20	CPLX0-1321	HflK-HflC complex; regulator of FtsH protease
21	ANTHRANSYN-CPLX	anthranilate synthase
22	CPLX0-7994	poly-N-acetyl-D-glucosamine synthase
23	CPLX0-7529	polysaccharide export complex
24	CPLX0-2502	molybdopterin synthase
25	CPLX0-3104	ClpAP
26	CPLX0-3959	Xer site-specific recombination system
27	CPLX0-231	galactitol-specific PTS enzyme II
28	CPLX-156	mannitol-specific PTS enzyme II CmtBA
29	NAP-CPLX	periplasmic nitrate reductase
30	TMAOREDUCTI-CPLX	trimethylamine N-oxide reductase 1
31	CPLX0-7720	undecaprenyl-phosphate-alpha-L-Ara4N flippase
32	CPLX0-1163	HslVU protease
33	ABC-6-CPLX	glutathione / L-cysteine ABC exporter CydDC
34	CPLX0-8239	Grx4-IbaG complex
35	ACETOACETYL-COA-TRANSFER-CPLX	acetoacetyl-CoA transferase
36	CPLX0-7852	GadE-RcsB DNA-binding transcriptional activator
37	CPLX0-3925	DNA polymerase V
38	CPLX-63	trimethylamine N-oxide reductase 2
39	ACETOLACTSYNIII-CPLX	acetolactate synthase / acetohydroxybutanoate synthase
40	CPLX0-4	aromatic carboxylic acid efflux pump
41	GLUTAMATESYN-DIMER	glutamate synthase
42	GLUTAMATESYN-CPLX	glutamate synthase
43	CPLX0-3821	HypA-HypB heterodimer
44	PHES-CPLX	phenylalanine-tRNA ligase
45	CPLX0-2661	McrBC restriction endonuclease
46	CPLX0-5	enterobactin export complex EntS-TolC
47	NRDACTMULTI-CPLX	anaerobic nucleoside-triphosphate reductase activating system
48	CPLX0-7976	translocation and assembly module
49	ABC-54-CPLX	divisome protein complex FtsEX
50	CPLX-3945	curli secretion and assembly complex
51	CPLX0-241	tagatose-1,6-bisphosphate aldolase 2
52	CPLX0-7	N-acetylmuramic acid-specific PTS enzyme II
53	ABC-21-CPLX	putative transport complex, ABC superfamily
54	FAO-CPLX	aerobic fatty acid oxidation complex
55	CPLX0-7704	ATP-dependent Lipid A-core flippase
56	RIBONUCLEOSIDE-DIP-REDUCTII-CPLX	ribonucleoside-diphosphate reductase 2
57	DTDPRHAMSYNTHMULTI-CPLX	dTDP-L-rhamnose synthetase complex
58	APP-UBIOX-CPLX	cytochrome bd-II ubiquinol oxidase
59	CPLX0-2221	Colicin E9 translocon
60	CPLX0-8238	putative menaquinol-cytochrome c reductase NrfCD
61	CPLX0-8182	N6-L-threonylcarbamoyladenine synthase
62	CPLX0-3976	Enterobacterial Common Antigen Biosynthesis Protein Complex
63	CPLX0-8179	peptidoglycan glycosyltransferase / peptidoglycan DD-transpeptidase - MrcA-LpoA complex
64	ASPCARBTRANS-CPLX	aspartate carbamoyltransferase
65	CPLX0-8230	HigB-HigA toxin/antitoxin complex and DNA-binding transcriptional repressor
66	PABASYN-CPLX	4-amino-4-deoxychorismate synthase
67	CPLX0-7684	L-valine exporter
68	PC00084	RcsAB DNA-binding transcriptional dual regulator
69	CPLX0-8232	carnitine monooxygenase
70	CPLX0-1668	anaerobic fatty acid beta-oxidation complex
71	RNAP54-CPLX	RNA polymerase sigma54
72	PYRNUTRANSHYDROGEN-CPLX	pyridine nucleotide transhydrogenase
73	ETHAMLY-CPLX	ethanolamine ammonia-lyase
74	YDGEF-CPLX	multidrug/spermidine efflux pump
75	CPLX-159	putative PTS enzyme II FrvAB
76	CPLX0-8213	periplasmic protein-L-methionine sulfoxide reducing system
77	RNAPS-CPLX	RNA polymerase sigma S
78	CPLX-158	fructose-specific PTS enzyme II
79	CPLX0-3922	primosome
80	CPLX0-7909	RnlA-RnlB toxin-antitoxin complex
81	CPLX0-7624	YhaV-PrlF toxin-antitoxin complex
82	CPLX0-7791	RelB-RelE antitoxin/toxin complex / DNA-binding transcriptional repressor
83	CPLX0-7610	N-acetyl-D-galactosamine specific PTS (cryptic)
84	CPLX0-7823	DosC-DosP complex
85	ABC-61-CPLX	putative transport complex, ABC superfamily
86	CPLX0-7787	DinJ-YafQ antitoxin/toxin complex / DNA-binding transcriptional repressor
87	CPLX0-7988	PaaF-PaaG hydratase-isomerase complex
88	CPLX0-3930	FlhDC DNA-binding transcriptional dual regulator
89	CPLX0-8174	Cas1-Cas2 complex
90	CPLX0-245	alkyl hydroperoxide reductase
91	CPLX0-7916	RcsB-BglJ DNA-binding transcriptional activator
92	CPLX0-7788	NAD-dependent dihydropyrimidine dehydrogenase
93	CPLX-157	glucose-specific PTS enzyme II
94	CPLX0-3241	ubiquinol-[NapC cytochrome c] reductase NapGH
95	CPLX0-8227	FicT-FicA complex
96	CPLX0-3937	evolved beta-D-galactosidase
97	CPLX0-1841	predicted xanthine dehydrogenase
98	CPLX0-7942	Grx4-BolA complex
99	SECD-SECF-YAJC-YIDC-CPLX	Sec translocon accessory complex
100	FABZ-CPLX	3-hydroxy-acyl-[acyl-carrier-protein] dehydratase
101	NITRITREDUCT-CPLX	nitrite reductase - NADH dependent
102	MONOMER0-2461	MtlR-HPr
103	LTARTDEHYDRA-CPLX	L(+)-tartrate dehydratase
104	CPLX0-7986	HypCD complex involved in hydrogenase maturation
105	CPLX0-3781	YefM-YoeB antitoxin/toxin complex / DNA-binding transcriptional repressor
106	CPLX0-7425	HipAB toxin/antitoxin complex / DNA-binding transcriptional repressor
107	NRFMULTI-CPLX	periplasmic nitrite reductase NrfAB
108	CPLX0-7822	MqsA-MqsR antitoxin/toxin complex
109	ACETOLACTSYNI-CPLX	acetohydroxybutanoate synthase / acetolactate synthase
110	CPLX0-2561	bacterial condensin MukBEF
111	RNAP32-CPLX	RNA polymerase sigma 32
112	CPLX0-240	tagatose-1,6-bisphosphate aldolase 1
113	CPLX0-3957	ATP dependent structure specific DNA nuclease
114	CPLX-168	trehalose-specific PTS enzyme II
115	CPLX-3942	sulfurtransferase complex TusBCD
116	TRANS-CPLX-201	multidrug efflux pump AcrAB-TolC
117	GCVMULTI-CPLX	glycine cleavage system
118	F-O-CPLX	ATP synthase Fo complex
119	ABC-45-CPLX	intermembrane phospholipid transport system
120	RECFOR-CPLX	RecFOR complex
121	UVRABC-CPLX	excision nuclease UvrABC
122	ENTMULTI-CPLX	enterobactin synthase
123	CYT-D-UBIOX-CPLX	cytochrome bd-I ubiquinol oxidase
124	RUVABC-CPLX	resolvasome
125	CPLX0-7450	flagellar motor switch complex
126	ABC-18-CPLX	D-galactose / methyl-beta-D-galactoside ABC transporter
127	CPLX0-1923	energy transducing Ton complex
128	CPLX0-1924	vitamin B12 outer membrane transport complex
129	MUTHLS-CPLX	MutHLS complex, methyl-directed mismatch repair
130	CPLX0-3108	ClpAXP
131	ABC-19-CPLX	molybdate ABC transporter
132	ANGLYC3PDEHYDROG-CPLX	anaerobic glycerol-3-phosphate dehydrogenase
133	ABC-33-CPLX	xylose ABC transporter
134	ABC-11-CPLX	iron(III) hydroxamate ABC transporter
135	CPLX0-8167	hydrogenase 1, oxygen tolerant hydrogenase
136	FORMHYDROGI-CPLX	hydrogenase 1
137	TRANS-200-CPLX	macrolide ABC exporter
138	CPLX0-1341	SufBC2D Fe-S cluster scaffold complex
139	ABC-12-CPLX	L-glutamine ABC transporter
140	NITRATREDUCTZ-CPLX	nitrate reductase Z
141	CPLX-155	N,N'-diacetylchitobiose-specific PTS enzyme II
142	CPLX0-3958	EcoKI restriction-modification system
143	NITRATREDUCTA-CPLX	nitrate reductase A
144	EIISGA	L-ascorbate specific PTS enzyme II
145	ABC-56-CPLX	aliphatic sulfonate ABC transporter
146	ABC-32-CPLX	thiamin(e) ABC transporter
147	FORMATEDEHYDROGO-CPLX	formate dehydrogenase O
148	RECBCD	exodeoxyribonuclease V
149	DIMESULFREDUCT-CPLX	dimethyl sulfoxide reductase
150	TSR-CPLX	chemotaxis signaling complex - serine sensing
151	TSR-GLUME	chemotaxis signaling complex - serine sensing containing TsrGlu-methyl
152	TSR-GLN	chemotaxis signaling complex - serine sensing TsrGln
153	TSR-GLU	chemotaxis signaling complex - serine sensing TsrGlu
154	ABC-64-CPLX	taurine ABC transporter
155	CPLX0-8152	cystine / cysteine ABC transporter
156	ABC-2-CPLX	arabinose ABC transporter
157	CPLX0-7807	putative multidrug efflux pump MdtNOP
158	ABC-57-CPLX	multidrug ABC exporter
159	PABSYNMULTI-CPLX	para-aminobenzoate synthase multi-enzyme complex
160	CPLX0-3932	multidrug efflux pump AcrAD-TolC
161	TAP-GLU	chemotaxis signaling complex - dipeptide sensing containing TapGlu
162	TAP-CPLX	chemotaxis signaling complex - dipeptide sensing
163	TAP-GLUME	chemotaxis signaling complex - dipeptide sensing containing TapGlu-methyl
164	TAP-GLN	chemotaxis signaling complex - dipeptide sensing containing TapGln
165	CPLX0-3801	DNA polymerase III, preinitiation complex
166	CPLX0-761	putative xanthine dehydrogenase
167	CPLX0-2081	dihydroxyacetone kinase
168	CPLX0-2982	FtsH/HflKC protease complex
169	CITLY-CPLX	citrate lyase, inactive
170	ACECITLY-CPLX	citrate lyase
171	CPLX0-2141	multidrug efflux pump AcrEF-TolC
172	CPLX-170	galactosamine-specific PTS enzyme II (cryptic)
173	ABC-49-CPLX	glutathione ABC transporter
174	TRG-CPLX	chemotaxis signaling complex - ribose/galactose/glucose sensing
175	TRG-GLUME	chemotaxis signaling complex - ribose/galactose/glucose sensing containingTrgGlu-Methyl
176	TRG-GLN	chemotaxis signaling complex - ribose/galactose/glucose sensing containing TrgGln
177	TRG-GLU	chemotaxis signaling complex - ribose/galactose/glucose sensing containing TrgGlu
178	TRANS-CPLX-203	2,3-diketo-L-gulonate:Na+ symporter
179	CPLX-169	sorbitol-specific PTS enzyme II
180	SEC-SECRETION-CPLX	Sec Holo-Translocon
181	CPLX0-2121	multidrug efflux pump EmrAB-TolC
182	ABC-5-CPLX	vitamin B12 ABC transporter
183	CPLX0-2361	DNA polymerase III, core enzyme
184	ABC-42-CPLX	D-allose ABC transporter
185	TRANS-CPLX-204	multidrug efflux pump MdtEF-TolC
186	CPLX-165	mannose-specific PTS enzyme II
187	METNIQ-METHIONINE-ABC-CPLX	L-methionine/D-methionine ABC transporter
188	CPLX0-7458	glycolate dehydrogenase
189	ABC-28-CPLX	ribose ABC transporter
190	ALPHA-SUBUNIT-CPLX	formate dehydrogenase N, subcomplex
191	FORMATEDEHYDROGN-CPLX	formate dehydrogenase N
192	CPLX0-2161	multidrug efflux pump EmrKY-TolC
193	EIISGC	putative PTS enzyme II SgcBCA
194	ABC-60-CPLX	putative transport complex, ABC superfamily
195	CPLX0-7805	aldehyde dehydrogenase
196	TAR-CPLX	chemotaxis signaling complex - aspartate sensing
197	TAR-GLUME	chemotaxis signaling complex - aspartate sensing containing TarGlu-methyl
198	TAR-GLN	chemotaxis signaling complex - aspartate sensing containing TarGln
199	TAR-GLU	chemotaxis signaling complex - aspartate sensing containing TarGlu
200	ABC-48-CPLX	putative transport complex, ABC superfamily
201	ABC-26-CPLX	glycine betaine ABC transporter
202	CPLX0-8119	putative PTS enzyme II FryBCA
203	CYT-O-UBIOX-CPLX	cytochrome bo3 ubiquinol oxidase
204	ABC-10-CPLX	ferric enterobactin ABC transporter
205	ABC-16-CPLX	maltose ABC transporter
206	ABC-7-CPLX	thiosulfate/sulfate ABC transporter
207	F-1-CPLX	ATP synthase F1 complex
208	SUCC-DEHASE	succinate:quinone oxidoreductase subcomplex
209	CPLX0-8160	succinate:quinone oxidoreductase
210	ABC-27-CPLX	phosphate ABC transporter
211	TATABCE-CPLX	twin arginine protein translocation system
212	CPLX0-8120	putative ABC transporter ArtPQMI
213	CPLX0-1941	ferric enterobactin outer membrane transport complex
214	CPLX0-3323	holocytochrome c synthetase
215	ABC-24-CPLX	spermidine preferential ABC transporter
216	ABC-70-CPLX	sulfate/thiosulfate ABC transporter
217	CPLX0-1721	copper/silver export system
218	CPLX0-3401	fimbrial complex
219	CPLX-160	putative PTS enzyme II FrwCBDPtsA
220	ABC-35-CPLX	heme trafficking system CcmABCDE
221	CPLX0-1601	selenate reductase
222	CPLX0-7952	ferric coprogen outer membrane transport complex
223	ABC-4-CPLX	L-arginine ABC transporter
224	CPLX0-1943	ferric citrate outer membrane transport complex
225	CPLX0-1942	ferrichrome outer membrane transport complex
226	ABC-34-CPLX	sn-glycerol 3-phosphate / glycerophosphodiester ABC transporter
227	CPLX0-1762	phenylacetyl-CoA 1,2-epoxidase
228	ABC-29-CPLX	putrescine ABC exporter
229	ABC-55-CPLX	putative transport complex, ABC superfamily
230	CPLX0-7958	methylphosphonate degradation complex
231	HCAMULTI-CPLX	putative 3-phenylpropionate/cinnamate dioxygenase
232	CPLX0-7935	carbon-phosphorus lyase core complex
233	ABC-25-CPLX	putrescine ABC transporter
234	ABC-14-CPLX	histidine ABC transporter
235	CPLX0-7628	lipopolysaccharide transport system - outer membrane assembly complex
236	ABC-41-CPLX	putative oligopeptide ABC transporter
237	FUMARATE-REDUCTASE	fumarate reductase
238	ABC-3-CPLX	lysine / arginine / ornithine ABC transporter
239	ABC-52-CPLX	putative transport complex, ABC superfamily
240	ABC-51-CPLX	putative transport complex, ABC superfamily
241	FORMHYDROG2-CPLX	hydrogenase 2
242	ABC-13-CPLX	glutamate / aspartate ABC transporter
243	ABC-46-CPLX	galactofuranose ABC transporter
244	ATPASE-1-CPLX	K+ transporting P-type ATPase
245	ABC-58-CPLX	Autoinducer-2 ABC transporter
246	ABC-40-CPLX	glycine betaine ABC transporter, non-osmoregulatory
247	ABC-9-CPLX	ferric citrate ABC transporter
248	TRANS-CPLX-202	multidrug efflux pump MdtABC-TolC
249	CPLX0-2201	The Tol-Pal Cell Envelope Complex
250	CPLX0-3361	NADH:quinone oxidoreductase I, peripheral arm
251	ABC-22-CPLX	oligopeptide ABC transporter
252	CPLX0-3970	murein tripeptide ABC transporter
253	CPLX0-7725	CRISPR-associated complex for antiviral defense
254	ABC-59-CPLX	putative D,D-dipeptide ABC transporter
255	CPLX0-7992	lipopolysaccharide transport system
256	CPLX0-2381	degradosome
257	ABC-20-CPLX	Ni(2+) ABC transporter
258	ABC-15-CPLX	branched chain amino acid / phenylalanine ABC transporter
259	ABC-304-CPLX	leucine / L-phenylalanine ABC transporter
260	ABC-8-CPLX	dipeptide ABC transporter
261	HYDROG3-CPLX	hydrogenase 3
262	ATPSYN-CPLX	ATP synthase / thiamin triphosphate synthase
263	FHLMULTI-CPLX	formate hydrogenlyase complex
264	CPLX0-3803	DNA polymerase III, holoenzyme
265	CPLX0-7451	flagellar export apparatus
266	CPLX0-250	hydrogenase 4
267	CPLX0-3933	Outer Membrane Protein Assembly Complex
268	NADH-DHI-CPLX	NADH:quinone oxidoreductase I
269	CPLX0-3382	Type II secretion system
270	FLAGELLAR-MOTOR-COMPLEX	flagellar motor complex
271	CPLX0-7452	flagellum
TABLE S2. The heteromeric protein complexes used in this study. This table provides the numeric labels used to identify 271 heteromeric protein complexes from EcoCyc shown in Figure S2, the IDs used to identify the protein complexes in the EcoCyc database, and the common names for the protein complexes.
